# Supplementary material
Source: PubMed Central journal article supplement (PMC2512256)
Supplement: NIHMS49706-supplement-01.pdf [file NIHMS49706-supplement-01.pdf]

**Supplementary Materials for the article “Effects of a Universal Classroom Behavior Management Program in First and Second Grades on Young Adult Behavioral, Psychiatric, and Social Outcomes” published in *Drug and Alcohol Dependence*\***

**Core Publications on GBG Impact in First Generation Baltimore Trial: First Grade through Middle School**

**Sheppard G. Kellam\*\***

American Institutes for Research, 921 E. Fort Avenue, Suite 225, Baltimore, MD 21230 USA

**C. Hendricks Brown**

Department of Epidemiology and Biostatistics, College of Public Health  
University of South Florida, 13201 Bruce B Downs Blvd, Tampa, FL 33612 USA

**Jeanne Poduska**

American Institutes for Research, 921 E. Fort Avenue, Suite 225, Baltimore, MD 21230 USA

**Nicholas Ialongo**

Johns Hopkins University, Bloomberg School of Public Health 624 N. Broadway, 8th Fl., Baltimore, MD 21205 USA

**Wei Wang**

Department of Epidemiology and Biostatistics, College of Public Health  
University of South Florida, 13201 Bruce B Downs Blvd, Tampa, FL 33612 USA

**Peter Toyinbo**

Department of Epidemiology and Biostatistics, College of Public Health  
University of South Florida, 13201 Bruce B Downs Blvd, Tampa, FL 33612 USA

**Hanno Petras**

University of Maryland, Department of Criminology and Criminal Justice,  
College Park, Maryland 20742 USA

**Carla Ford**

American Institutes for Research, 921 E. Fort Avenue, Suite 225, Baltimore, MD 21230 USA

**Amy Windham**

American Institutes for Research, 921 E. Fort Avenue, Suite 225, Baltimore, MD 21230 USA

**Holly C. Wilcox**

Department of Psychiatry & Behavioral Sciences, Johns Hopkins School of Medicine,  
600 North Wolfe Street/CMSC 346 Baltimore, MD 21287 USA

\*This material supplements but does not replace the content of the peer-reviewed paper published in *Drug and Alcohol Dependence*

\*\*Corresponding author: Sheppard G. Kellam, MD., American Institutes for Research, 921 E. Fort Avenue, Suite 225, Baltimore, MD 21230 USA, Phone: 410-347-8551, Fax: 410-347-8559, Email: [skellam@air.org](mailto:skellam@air.org)

## **Effects of a Universal Classroom Behavior Management Program in First and Second Grades on Young Adult Behavioral, Psychiatric, and Social Outcomes**

**S. Kellam, H. Brown, J Poduska, N. Ialongo, W. Wang, P. Toyinbo,  
H. Petras, C. Ford, A. Windham, H. Wilcox**

### **Core Publications on GBG Impact in First Generation Baltimore Trial: First Grade through Middle School**

- Dolan, L.J., Kellam, S.G., Brown, C.H., Werthamer-Larsson, L., Rebok, G.W., Mayer, L.S., Laudolff, J., Turkkan, J., Ford, C., Wheeler, L., 1993. The short-term impact of two classroom-based preventive interventions on aggressive and shy behaviors and poor achievement. *J. Appl. Dev. Psychol.* 14, 317-345.
- Kellam, S.G., Anthony, J.C., 1998. Targeting early antecedents to prevent tobacco smoking: findings from an epidemiologically based randomized field trial. *Am. J. Public Health* 88, 1490–1495.
- Kellam, S.G., Ling, X., Merisca, R., Brown, C.H., Ialongo, N., 1998. The effect of the level of aggression in the first grade classroom on the course and malleability of aggressive behavior into middle school. *Dev. Psychopathol.* 10, 165-185.  
Erratum in: 2000 *Dev. Psychopathol.* 12, 107.
- Kellam, S.G., Mayer, L.S., Rebok, G.W., Hawkins, W.E., 1998. Effects of improving achievement on aggressive behavior and of improving aggressive behavior on achievement through two preventive interventions: An investigation of causal paths. In: Dohrenwend, B. (Ed.), *Adversity, Stress, and Psychopathology*. London: Oxford University Press, pp. 486–505.
- Kellam, S.G., Rebok, G.W., 1992. Building developmental and etiological theory through epidemiologically based preventive intervention trials. In McCord, J., Tremblay, R.E. (Eds.), *Preventing antisocial behavior: Interventions from birth through adolescence*. New York: The Guilford Press, pp. 162-195.
- Kellam, S.G., Rebok, G.W., Ialongo, N., Mayer, L.S., 1994. The course and malleability of aggressive behavior from early first grade into middle school: results of a developmental epidemiologically-based preventive trial. *J. Child Psychol. Psychiatry* 35, 259–282. Erratum in 1994 *J. Child Psychol. Psychiatry* 35, 983.
- Kellam, S.G., Werthamer-Larsson, L., Dolan, L.J., Brown, C.H., Mayer, L.S., Rebok, G.W., Anthony, J.C., Laudolff, J., Edelsohn, G., Wheeler, L., 1991. Developmental epidemiologically-based preventive trials: Baseline modeling of early target behaviors and depressive symptoms. *Am. J. Community Psychol.* 19, 563-584.
- Rebok, G.W., Hawkins, W.E., Krener, P., Mayer, L.S., Kellam, S.G., 1996. Effect of concentration problems on the malleability of children's aggressive and shy behaviors. *J. Am. Acad. Child Adolesc. Psychiatry* 35, 193-203.
